# Supplementary material for: Novel Roles of the Greatwall Kinase Rim15 in Yeast Oxidative Stress Tolerance through Mediating Antioxidant Systems and Transcriptional Regulation
Source: MDPI journal article supplement (doi:10.3390/antiox13030260), 2024-02-21
Supplement: s1 [file s1]

## SUPPLEMENTARY MATERIALS

**Table S1.** Plasmids used in this study

| Plasmids                          | Description                                                                                | Source                                                   |
|-----------------------------------|--------------------------------------------------------------------------------------------|----------------------------------------------------------|
| p414-Cas9                         | p414, ARS/CEN, <i>KanMX</i> , AmpR, <i>TEF1p-SpCas9-CYC1t</i>                              | Lab preservation                                         |
| Cas9-NAT                          | ARS/CEN, NrsR, AmpR, <i>TEF1p-SpCas9-CYC1t</i>                                             | Gifted from Prof. Yueqin Tang at Sichuan University [38] |
| pRS42H-gRNA                       | pRS42H, 2 $\mu$ m, <i>hphNT</i> , AmpR, <i>SNR52p-gRNA-SUP4t</i>                           | Lab preservation                                         |
| pRS42H-gRNA-5' <i>RIM15</i>       | Plasmid containing gRNA targeted to 5' terminal of gene <i>RIM15</i>                       | This study                                               |
| pRS42H-gRNA- <i>yap1</i> $\Delta$ | Plasmid containing gRNA targeted to coding sequence of <i>YAP1</i>                         | This study                                               |
| pGADT7                            | pUC, 2 $\mu$ m, <i>LEU2</i> , AmpR, <i>ADH1p-GAL4</i> activation domain (AD)- <i>ADH1t</i> | Clontech                                                 |
| pGBKT7                            | pUC, 2 $\mu$ m, <i>TRP1</i> , KanR, <i>ADH1p-GAL4</i> DNA binding domain (BD) <i>ADH1t</i> | Clontech                                                 |
| pGADT7-Yap1                       | <i>YAP1</i> was from BY4741 fused to pGADT7                                                | This study                                               |
| pGBKT7-Rim15 <sup>1-344</sup>     | 1-1032 bp of <i>RIM15</i> was from BY4741 fused to pGBKT7                                  | This study                                               |
| pGBKT7-Rim15 <sup>359-1771</sup>  | 1075-5313 bp of <i>RIM15</i> was from BY4741 fused to pGBKT7                               | This study                                               |
| pRS42H-gRNA-2716 <i>RIM15</i>     | Plasmid containing gRNA targeted to kinase domain of gene <i>RIM15</i>                     | This study                                               |

**Table S2.** Strains used in this study

| Strains                         | Description                                                                                                                                                                                                             | Source                                                              |
|---------------------------------|-------------------------------------------------------------------------------------------------------------------------------------------------------------------------------------------------------------------------|---------------------------------------------------------------------|
| <i>Escherichia coli</i>         |                                                                                                                                                                                                                         |                                                                     |
| DH5α                            | For plasmid construction and propagation                                                                                                                                                                                | Invitrogen Ltd                                                      |
| <i>Saccharomyces cerevisiae</i> |                                                                                                                                                                                                                         |                                                                     |
| BY4741                          | <i>MATa, his3Δ1, leu2Δ0, met15Δ0, ura3Δ0</i>                                                                                                                                                                            | Lab preservation                                                    |
| BY4741-Cas9                     | Transform p414-Cas9 plasmid into BY4741                                                                                                                                                                                 | This study                                                          |
| <i>RIM15</i> OE                 | BY4741, <i>RIM15p::TEF1p</i>                                                                                                                                                                                            | This study                                                          |
| <i>rim15Δ</i>                   | BY4741, <i>rim15Δ::KanMX</i>                                                                                                                                                                                            | Open Biosystems (Gifted from Prof. Shanshan Li at Hubei University) |
| <i>rgs2Δ</i>                    | BY4741, <i>rgs2Δ::KanMX</i>                                                                                                                                                                                             | Open Biosystems (Gifted from Prof. Shanshan Li at Hubei University) |
| <i>sip18Δ</i>                   | BY4741, <i>sip18Δ::KanMX</i>                                                                                                                                                                                            | Open Biosystems (Gifted from Prof. Shanshan Li at Hubei University) |
| <i>srx1Δ</i>                    | BY4741, <i>srx1Δ::KanMX</i>                                                                                                                                                                                             | Open Biosystems (Gifted from Prof. Shanshan Li at Hubei University) |
| <i>ydj1Δ</i>                    | BY4741, <i>ydj1Δ::KanMX</i>                                                                                                                                                                                             | Open Biosystems (Gifted from Prof. Shanshan Li at Hubei University) |
| <i>yap1Δ</i>                    | BY4741, <i>yap1Δ</i>                                                                                                                                                                                                    | This study                                                          |
| <i>rim15Δ</i> -Cas9             | Transform Cas9-NAT plasmid into <i>rim15Δ</i>                                                                                                                                                                           | This study                                                          |
| <i>rim15Δyap1Δ</i>              | BY4741, <i>rim15Δ::KanMX, yap1Δ</i>                                                                                                                                                                                     | This study                                                          |
| AH109                           | <i>MATa, trp1-901, leu2-3, 112, ura3-52, his3-200, gal4Δ, gal80Δ, LYS2::GAL1<sub>UAS</sub>-GAL1<sub>TATA</sub>-HIS3, GAL2<sub>UAS</sub>-GAL2<sub>TATA</sub>-ADE2, URA3::MEL1<sub>UAS</sub>-MEL1<sub>TATA</sub>-lacZ</i> | Clontech                                                            |
| pA-Yap1                         | Transform pGADT7-Yap1 plasmid into AH109                                                                                                                                                                                | This study                                                          |
| pB-Rim15 <sup>1-344</sup>       | Transform pGBKT7-Rim15 <sup>1-344</sup> plasmid into AH109                                                                                                                                                              | This study                                                          |
| pB-Rim15 <sup>359-1771</sup>    | Transform pGBKT7-Rim15 <sup>359-1771</sup> plasmid into AH109                                                                                                                                                           | This study                                                          |

**Table S2.** (Continued) Strains used in this study

| Strains                              | Description                                                                    | Source           |
|--------------------------------------|--------------------------------------------------------------------------------|------------------|
| pA-Mcm2+pB-Mcm10                     | Positive control                                                               | Lab preservation |
| pA+pB                                | Negative control                                                               | Lab preservation |
| pA-Yap1+pB                           | Transform pGADT7-Yap1 and pGBKT7 plasmids into AH109                           | This study       |
| pA+pB-Rim15 <sup>1-344</sup>         | Transform pGADT7 and pGBKT7-Rim15 <sup>1-344</sup> plasmids into AH109         | This study       |
| pA+pB-Rim15 <sup>359-1771</sup>      | Transform pGADT7 and pGBKT7-Rim15 <sup>359-1771</sup> plasmids into AH109      | This study       |
| pA-Yap1+pB-Rim15 <sup>1-344</sup>    | Transform pGADT7-Yap1 and pGBKT7-Rim15 <sup>1-344</sup> plasmids into AH109    | This study       |
| pA-Yap1+pB-Rim15 <sup>359-1771</sup> | Transform pGADT7-Yap1 and pGBKT7-Rim15 <sup>359-1771</sup> plasmids into AH109 | This study       |
| Rim15 <sup>K823A</sup>               | BY4741, the codon of Rim15 K823 was replaced with GCG                          | This study       |
| Rim15 <sup>D918A</sup>               | BY4741, the codon of Rim15 D918 was replaced with GCC                          | This study       |
| Rim15 <sup>KDΔ</sup>                 | BY4741, 2380-3762 bp of <i>RIM15</i> was deleted                               | This study       |
| Rim15 <sup>KDΔ</sup> -Cas9           | Transform Cas9-NAT plasmid into Rim15 <sup>KDΔ</sup>                           | This study       |
| Rim15 <sup>KDΔ</sup> <i>yap1Δ</i>    | BY4741, 2380-3762 bp of <i>RIM15</i> was deleted, <i>yap1Δ</i>                 | This study       |

**Table S3.** Primers used in this study\*.

| Primers                                 | Sequence (5'-3')                                                                                  |
|-----------------------------------------|---------------------------------------------------------------------------------------------------|
| gRNA-5' <i>RIM15</i> -F                 | <u>GATCGCCTGCTGTAGAGGTTCTGG</u>                                                                   |
| gRNA-5' <i>RIM15</i> -R                 | <u>AAACCCAGAACCTCTACAGCAGGC</u>                                                                   |
| M13-R                                   | CAGGAAACAGCTATGACC                                                                                |
| Donor- <i>TEF1p</i> -5' <i>RIM15</i> -F | <u>ATTGTCTGCCGTTTTTTGTATAGATATAGACGTATATATATACAGAATT</u><br><u>CTCTATCCCATAGCTTCAAAATGTTTCT</u>   |
| Donor- <i>TEF1p</i> -5' <i>RIM15</i> -R | <u>ATGCCAAGTCCCTCTTTCATAGCCTGAGATCCGCCTGCGGTGTTACTT</u><br><u>CTATTGAACATCTTAGATTAGATTGCTATGC</u> |
| Verify- <i>TEF1p</i> -F                 | CGATGACCTCCCATTGATAT                                                                              |
| Verify-5' <i>RIM15</i> -R               | CTTGAACGTTATAGTGCAAC                                                                              |
| RT- <i>RGS2</i> -F                      | ATTAGCGAGGAGAAGCTCTT                                                                              |
| RT- <i>RGS2</i> -R                      | GCACTTCTCAAATATCTCCC                                                                              |
| RT- <i>SIP18</i> -F                     | TGATTCCCATCAGAAGGGAA                                                                              |
| RT- <i>SIP18</i> -R                     | TGATCATGGCCCATCTTCAT                                                                              |
| RT- <i>SRX1</i> -F                      | GCTAGCAAGACATGCTCTCT                                                                              |
| RT- <i>SRX1</i> -R                      | GCCGCCGAAGGCATAATATA                                                                              |
| RT- <i>YDJ1</i> -F                      | TGTCACGGTACTGGTGATAT                                                                              |
| RT- <i>YDJ1</i> -R                      | GACCATCTTTCATACCTGGT                                                                              |
| gRNA- <i>yap1Δ</i> -F                   | <u>CCGCAGTGAAAGATAAATGATCTGAACCAGGTATGTGGAACAGTTTT</u><br><u>AGAGCTAGAAATAGCAAG</u>               |
| gRNA- <i>yap1Δ</i> -R                   | <u>CTTGCTATTTCTAGCTCTAAAAC</u> TGTTCCACATACCTGGTTCAGATCAT<br><u>TTATCTTTCCTGCGG</u>               |
| Verify-gRNA- <i>yap1Δ</i> -R            | TGTTCCACATACCTGGTTCA                                                                              |
| Donor- <i>yap1Δ</i> -F1                 | <u>TATACGAAGATCGGGGCTTT</u>                                                                       |
| Donor- <i>yap1Δ</i> -R1                 | <u>CTTTAAACGTTTTGGGTGGC</u>                                                                       |
| Donor- <i>yap1Δ</i> -F2                 | GCCACCCAAAACGTTTAAAG <u>GCGGGAAC</u> TTTATGGAAAAC                                                 |
| Donor- <i>yap1Δ</i> -R2                 | <u>CTACTCATGCCACTAACAAG</u>                                                                       |
| pGADT7-scaffold-F                       | ATCCATCGAGCTCGAGCTGC                                                                              |
| pGADT7-scaffold-R                       | GAATTCACTGGCCTCCATGGCC                                                                            |

**Table S3.** (Continued) Primers used in this study

| Primers                             | Sequence (5'-3')                                                                               |
|-------------------------------------|------------------------------------------------------------------------------------------------|
| pGBKT7-scaffold-F                   | ATGGCCATGGAGGCCGAATT                                                                           |
| pGBKT7-scaffold-R                   | CAGGTCCTCCTCGAGATCAGCTTC                                                                       |
| pA-Yap1-F                           | <u>GGCCATGGAGGCCAGTGAATTCATGAGTGTGTCTACCGCCAA</u>                                              |
| pA-Yap1-R                           | <u>GCAGCTCGAGCTCGATGGATTAGTTCATATGCTTATTCA</u>                                                 |
| pB-Rim15 <sup>1-344</sup> -F        | <u>ATCTCAGAGGAGGACCTGATGTTCAATAGAAGTAACACCGC</u>                                               |
| pB-Rim15 <sup>1-344</sup> -R        | <u>AATTCGGCCTCCATGGCCATACCATTATCTTGAGGAAATGTTGA</u>                                            |
| pB-Rim15 <sup>359-1771</sup> -F     | <u>ATCTCAGAGGAGGACCTGGCTTTGTTAGATCAATCCCTATCC</u>                                              |
| pB-Rim15 <sup>359-1771</sup> -R     | <u>AATTCGGCCTCCATGGCCATTCAAGTGCGTTTCATCAGAATC</u>                                              |
| <i>T7p</i> -F                       | TAATACGACTCACTATAGG                                                                            |
| Verify-Yap1-F                       | GGAAGGCTCTTTACTAAGGT                                                                           |
| Verify-Rim15 <sup>1-344</sup> -F    | TTTGCGAGCATAGAACGGAA                                                                           |
| Verify-Rim15 <sup>359-1771</sup> -F | TGCCGGTGATGAACTAGTT                                                                            |
| Verify- <i>ADH1t</i> -R             | ATTTTCGTTTTTAAACCTAAGAGTCAC                                                                    |
| gRNA-2716 <i>RIM15</i> -F           | <u>CCGCAGTGAAAGATAAATGATCGTGAATGATATGCATCAAAAAGTTTT</u><br><u>AGAGCTAGAAATAGCAAG</u>           |
| gRNA-2716 <i>RIM15</i> -R           | <u>CTTGCTATTTCTAGCTCTAAAACCTTTTGATGCATATCATTACGATCAT</u><br><u>TTATCTTTCACCTGCGG</u>           |
| Verify-gRNA-2716 <i>RIM15</i> -R    | TTTTGATGCATATCATTCAC                                                                           |
| Donor-Rim15 <sup>K823A</sup> -F1    | <u>AGTATTTCTTGACCCCAAG</u>                                                                     |
| Donor-Rim15 <sup>K823A</sup> -R1    | <u>CGGATTTGACATTTGTTACTTGATTTTGGCAATCATATCTGATTTCCCT</u><br><u>TAGAACCCTATAGCAAAATAATCTCCT</u> |
| Donor-Rim15-K823A-F2                | <u>AGTAACAAATGTCAAATCCG</u>                                                                    |
| Donor-Rim15-K823A-R2/               | <u>CATGATGAATGATCCCGTTCTGGTGCATGTCGTTTACACCGACAACG</u>                                         |
| Donor-Rim15-D918A-R1                | <u>ATTCGGTTA</u>                                                                               |
| Donor-Rim15-K823A-R3                | <u>ACATGACCTGCATTATCAATTAGTAGATTTTCAGGCTTTAAGTCATGA</u><br><u>TGAATGATCCC</u>                  |
| Donor-Rim15-D918A-F                 | GCAAAGGTGCTTATGGTAGT                                                                           |
| Donor-Rim15-D918A-R2                | <u>CCGAAATCTGTAAATTTACATGACCTGCATTATCAATTAGTAGATTT</u><br><u>TCAGGCTTTAAGGCATGATGAATGATCC</u>  |

**Table S3.** (Continued) Primers used in this study

| Primers                    | Sequence (5'-3')                                     |
|----------------------------|------------------------------------------------------|
| Verify-Rim15-pointmutant-R | CTTAGCGACGACTTATGTGG                                 |
| Donor-Rim15-KDΔ-F1         | <u>GGCTGGGGATAAGATCAAGA</u>                          |
| Donor-Rim15-KDΔ-R1         | <u>ATCTTTTATGCTAGGCGTTGG</u>                         |
| Donor-Rim15-KDΔ-F2         | CCAACGCCTAGCATAAAAGATA <u>AAGAATGTGGATTGGGATCATG</u> |
| Donor-Rim15-KDΔ-R2         | <u>TACTTGATCTGCGATCCCTC</u>                          |

\*Dashed underlines, cohesive terminus; Solid underlines, homologous fragment.

**Table S4.** Function annotation and changes of transcription level of the selected genes affected by *RIM15* deletion\*.

| Genes        | <b>log<sub>2</sub> (Fold change: <i>rim15Δ</i>/BY4741)</b> |         | Description                                                           |
|--------------|------------------------------------------------------------|---------|-----------------------------------------------------------------------|
|              | Transcriptome                                              | RT-qPCR |                                                                       |
| <i>ADA2</i>  | -1.26                                                      | -1.11   | Transcription coactivator                                             |
| <i>AQR1</i>  | -1.29                                                      | -0.91   | Plasma membrane transporter of the major facilitator superfamily      |
| <i>ERG5</i>  | -0.99                                                      | 0.08    | C-22 sterol desaturase                                                |
| <i>GND2</i>  | -1.68                                                      | -0.90   | 6-phosphogluconate dehydrogenase                                      |
| <i>GRE1</i>  | -1.29                                                      | -1.60   | Hydrophilin essential in desiccation-rehydration process              |
| <i>IME2</i>  | 1.12                                                       | -0.44   | Serine/threonine protein kinase involved in activation of meiosis     |
| <i>IRA2</i>  | 1.02                                                       | 0.45    | GTPase-activating protein                                             |
| <i>NAT4</i>  | -1.10                                                      | -0.75   | N alpha-acetyl-transferase                                            |
| <i>RGS2</i>  | -1.56                                                      | -0.67   | Negative regulator of glucose-induced cAMP signaling                  |
| <i>RPI1</i>  | -1.25                                                      | -0.64   | Transcription factor                                                  |
| <i>SDP1</i>  | -1.58                                                      | -1.71   | Stress-inducible dual-specificity MAP kinase phosphatase              |
| <i>SIP18</i> | -2.82                                                      | -1.39   | Phospholipid-binding hydrophilin                                      |
| <i>SKS1</i>  | -1.02                                                      | -0.77   | Putative serine/threonine protein kinase                              |
| <i>SRX1</i>  | -1.08                                                      | -2.14   | Sulfiredoxin                                                          |
| <i>SSA1</i>  | -1.03                                                      | -1.15   | ATPase involved in protein folding and NLS-directed nuclear transport |
| <i>TRA1</i>  | 1.07                                                       | 1.65    | Subunit of SAGA and NuA4 histone acetyltransferase complexes          |
| <i>YDJ1</i>  | -1.24                                                      | -1.95   | Type I HSP40 co-chaperone                                             |
| <i>YPK2</i>  | 1.12                                                       | 1.70    | AGC-type S/T protein kinase                                           |

\*Differential transcription levels from the transcriptome data were shown, which were further validated by RT-qPCR.

Annotation of the functions is retrieved from SGD ([www.yeastgenome.org](http://www.yeastgenome.org)).

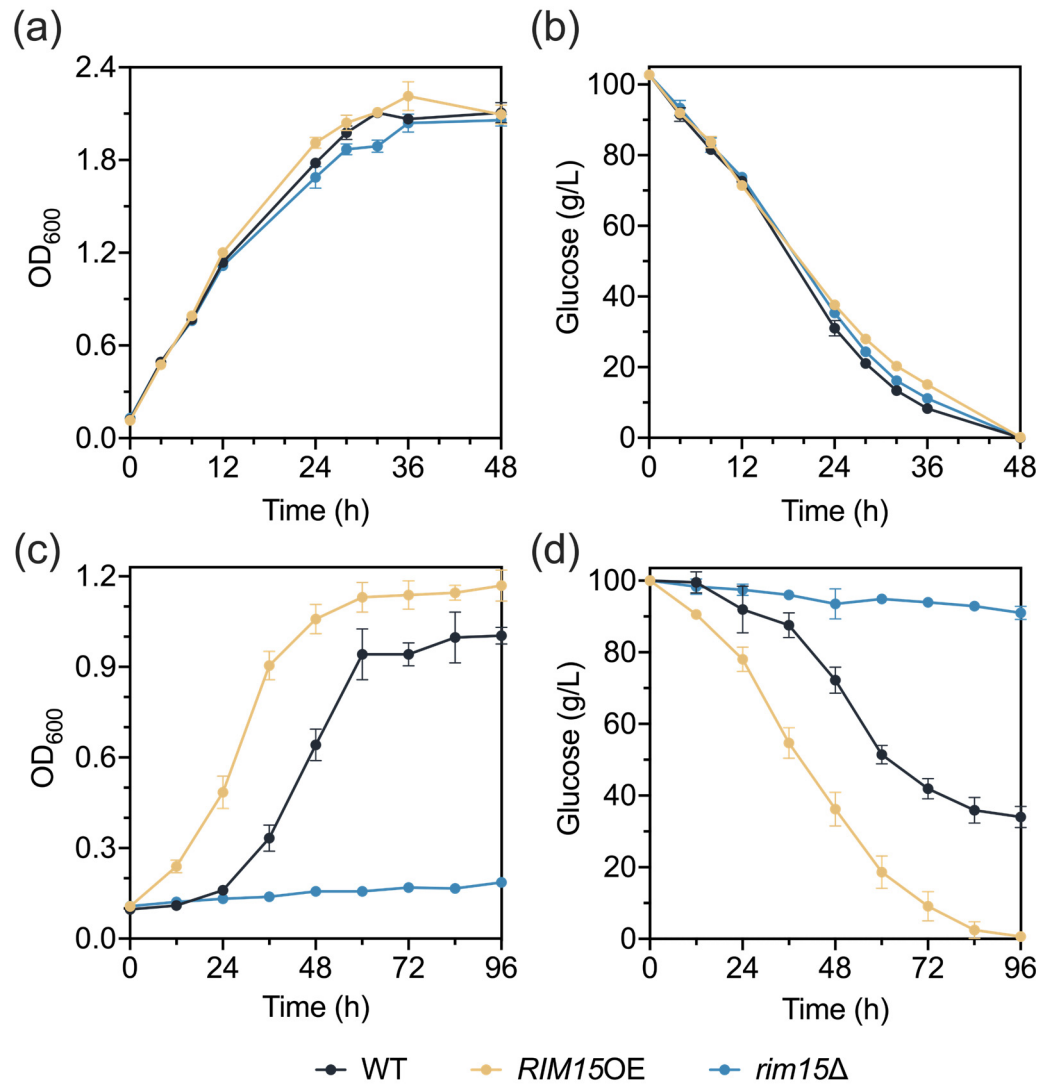

**Figure S1.** Effects of *RIM15* overexpression and deletion on yeast stress tolerance and fermentation performance. Fermentation of the *RIM15* overexpression strain *S. cerevisiae* *RIM15OE* and the *RIM15* deletion strain *S. cerevisiae* *rim15Δ* was performed under non-stress (a,b) and 5 g/L acetic acid stress (c,d) conditions, with *S. cerevisiae* BY4741 as a control strain. The biological triplicates were employed. Error bars represented the standard deviations.



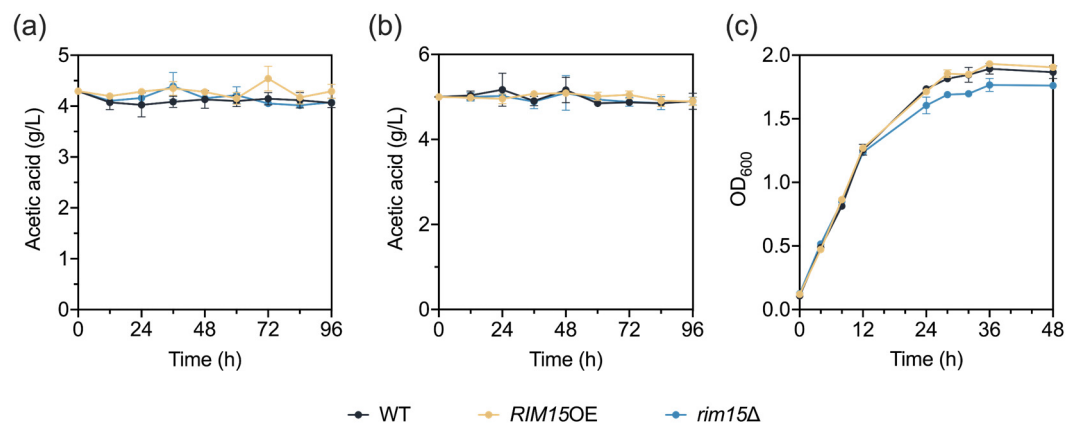

**Figure S2.** Effects of *RIM15* overexpression and deletion on acetic acid concentration in the fermentation broth and low pH stress tolerance. Acetic acid consumption was detected in the presence of 4.2 g/L (a) and 5 g/L (b) acetic acid. (c), Growth of *S. cerevisiae* *RIM15OE*, *rim15Δ*, and BY4741 strains was evaluated under pH3.5. The biological triplicates were employed. Error bars represented the standard deviations.

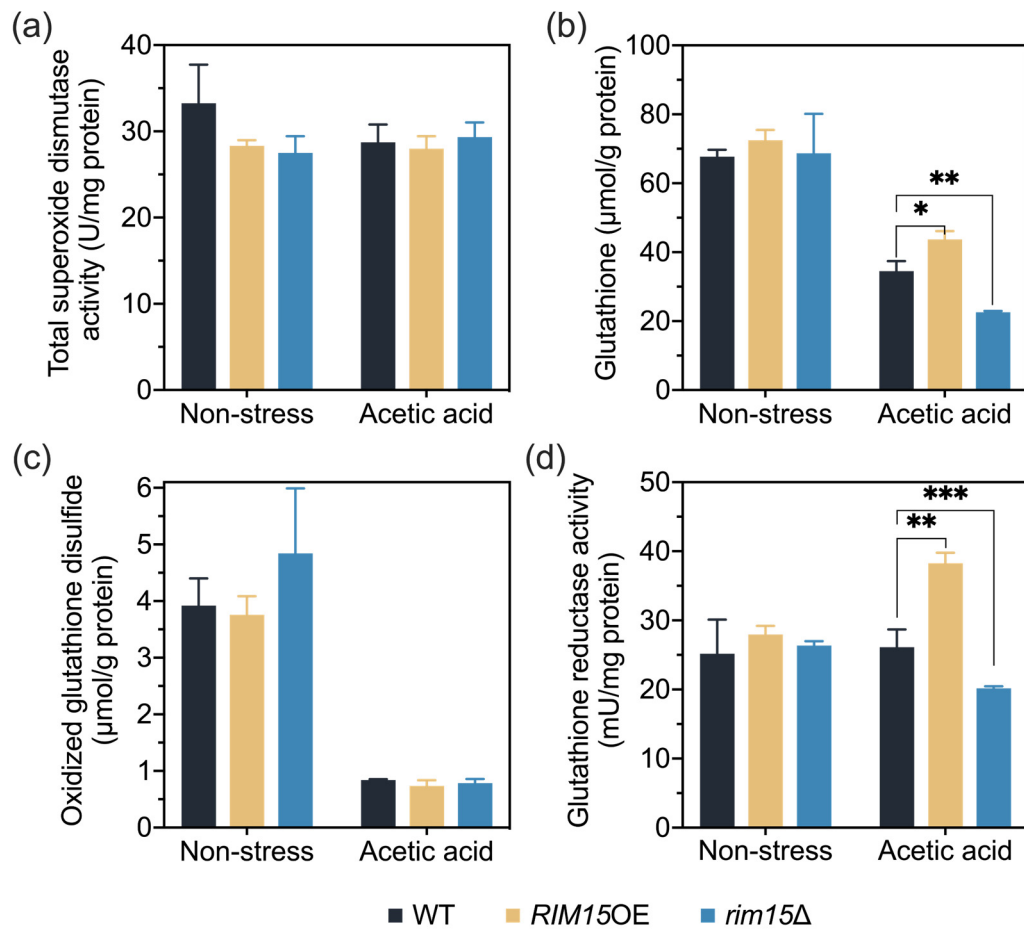

**Figure S3.** Effects of *RIM15* overexpression and deletion on the activities of the antioxidant system under acetic acid stress condition. SOD activity (a), GSH content (b), GSSG content (c), and GR activity (d) of *S. cerevisiae* *RIM15OE*, *rim15Δ*, and the control strain BY4741 were measured with or without the treatment with 4.2 g/L acetic acid. The biological triplicates were employed. Error bars represented the standard deviations. Statistical analysis was performed by *t* test, and the significant levels were indicated as follows: \* $P < 0.05$ , \*\* $P < 0.01$ , \*\*\* $P < 0.001$ .

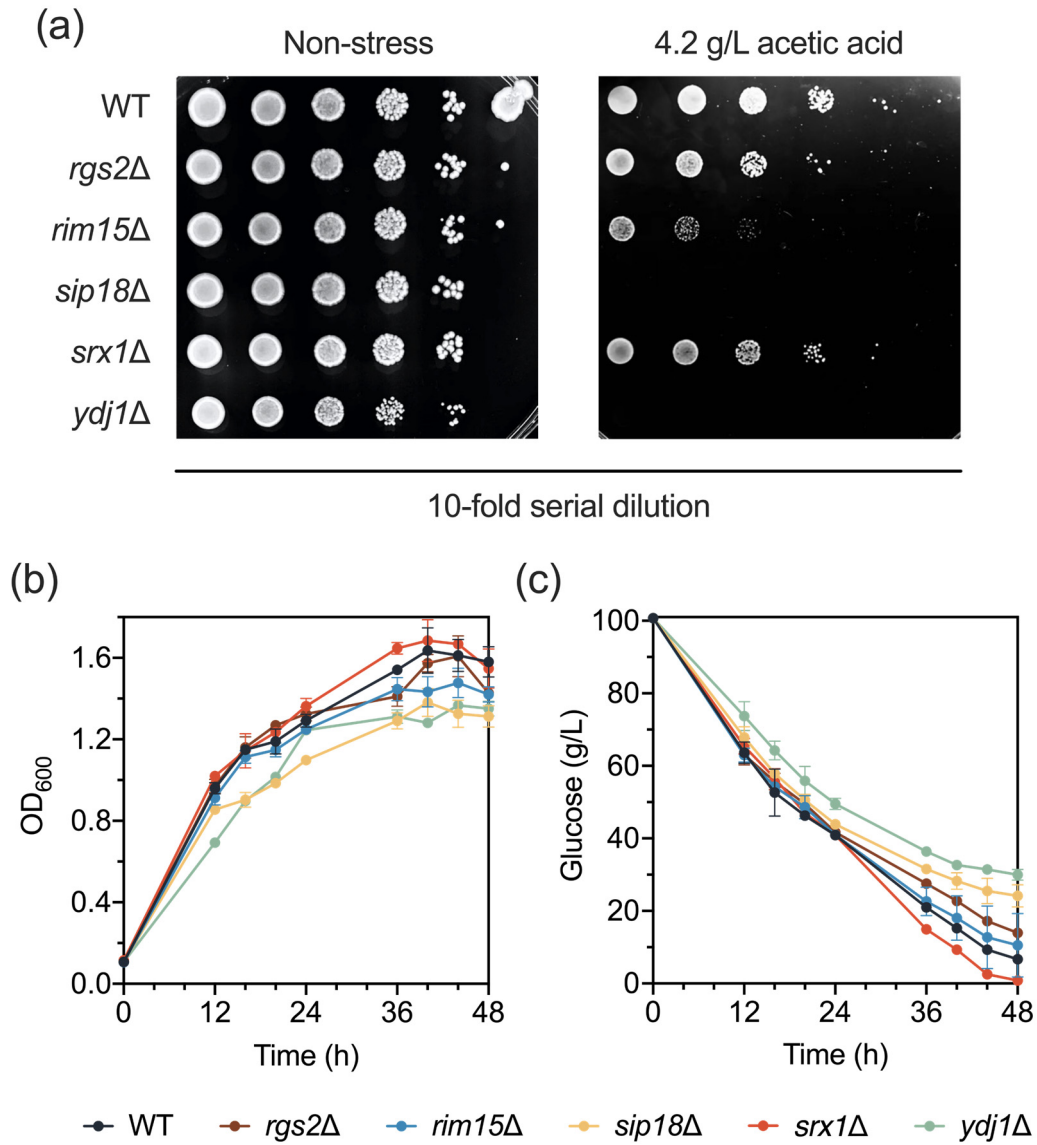

**Figure S4.** Evaluation of stress tolerance and fermentation performance of the gene deletion yeast strains. (a), Evaluation of stress tolerance with *S. cerevisiae* BY4741 and the knock-out strains of *S. cerevisiae* *rgs2* $\Delta$ , *rim15* $\Delta$ , *sip18* $\Delta$ , *srx1* $\Delta$ , and *ydj1* $\Delta$  was performed using spot assays under non-stress and 4.2 g/L acetic acid stress conditions. (b,c), Growth and fermentation performance of the yeast strains under non-stress condition. The biological triplicates were employed. Error bars represented the standard deviations.

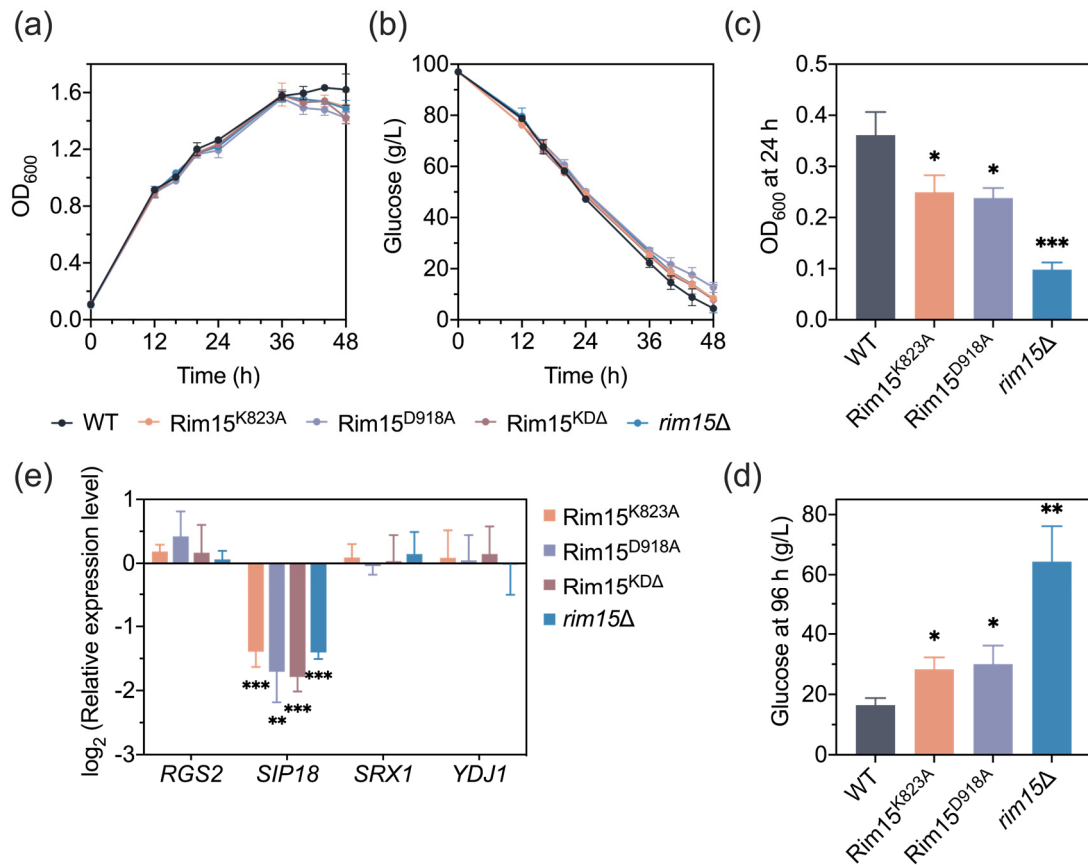

**Figure S5.** Effect of Rim15 kinase activity on fermentation and expression of target genes. Fermentation of *S. cerevisiae* BY4741, Rim15 kinase-dead yeast strains, and knock-out strain *rim15Δ* was evaluated under non-stress (**a**, **b**) and 4.2 g/L acetic acid stress (**c**, **d**) conditions. (**e**), Transcription of target genes *RGS2*, *SIP18*, *SRX1*, and *YDJ1* in Rim15 kinase-dead strains (Rim15<sup>K823A</sup>, Rim15<sup>D918A</sup>, and Rim15<sup>KDΔ</sup>) and knock-out strain *rim15Δ* was detected by RT-qPCR analysis without inhibitors. The biological triplicates were employed. Error bars represented the standard deviations. Statistical analysis was performed by *t* test, \**P*<0.05, \*\**P*<0.01, \*\*\**P*<0.001.

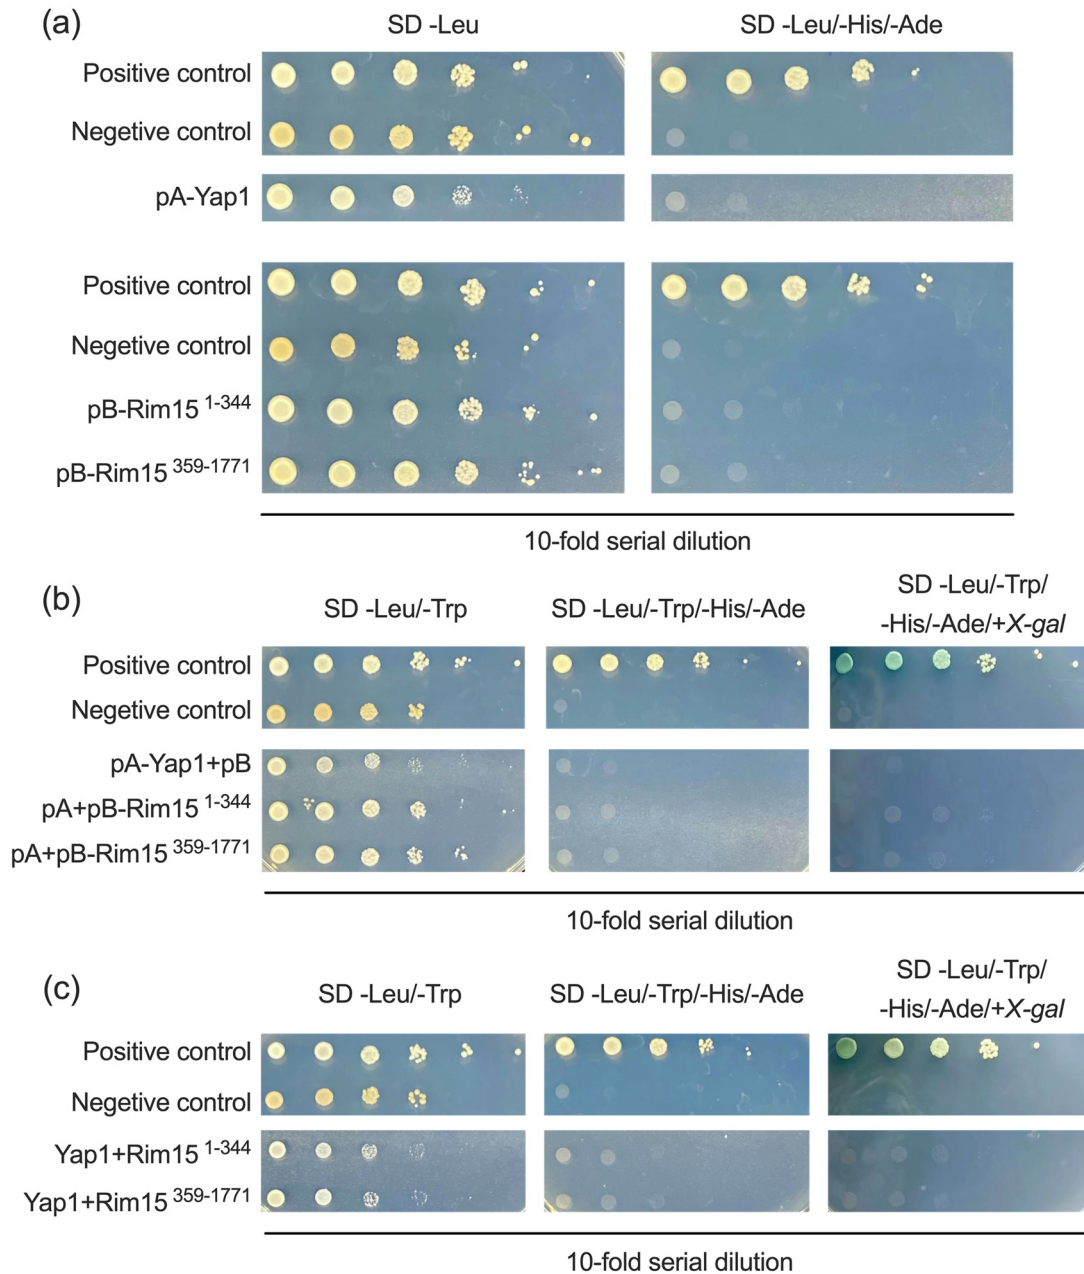

**Figure S6.** Analysis of protein-protein interaction of Rim15 and Yap1. The self-activation of a single protein (a) and protein with empty vector (b) was verified on SD plates without His and Ade and with *X-gal* overlay. If the colony survived on the SD agar plates lacking His and Ade or turned blue with the supplement of *X-gal*, indicating the existence of self-activation. (c), Yeast two-hybrid assays were employed to verify the interaction between Rim15 and Yap1 *in vivo*. If the colony survived on the SD agar plates lacking Leu, Trp, His, and Ade, or turned blue with the supplement of *X-gal*, indicating there was an interaction between the two proteins.

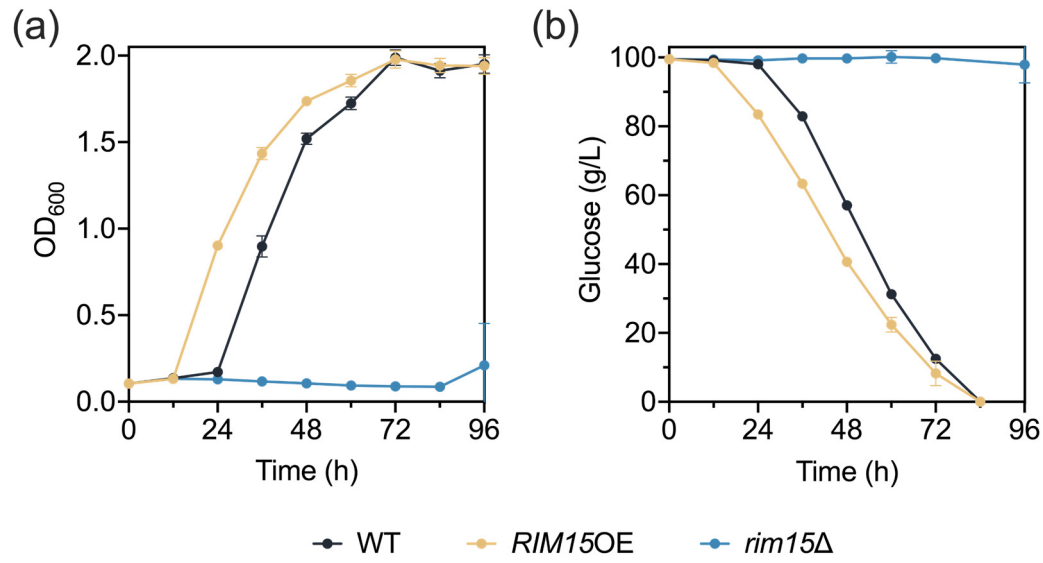

**Figure S7.** Effect of *RIM15* overexpression and deletion on oxidative stress tolerance and fermentation performance. Growth **(a)** and glucose consumption **(b)** of *S. cerevisiae* BY4741, *RIM15OE*, and *rim15Δ* strains were observed in the presence of 10 mM H<sub>2</sub>O<sub>2</sub>. The biological triplicates were employed. Error bars represented the standard deviations.

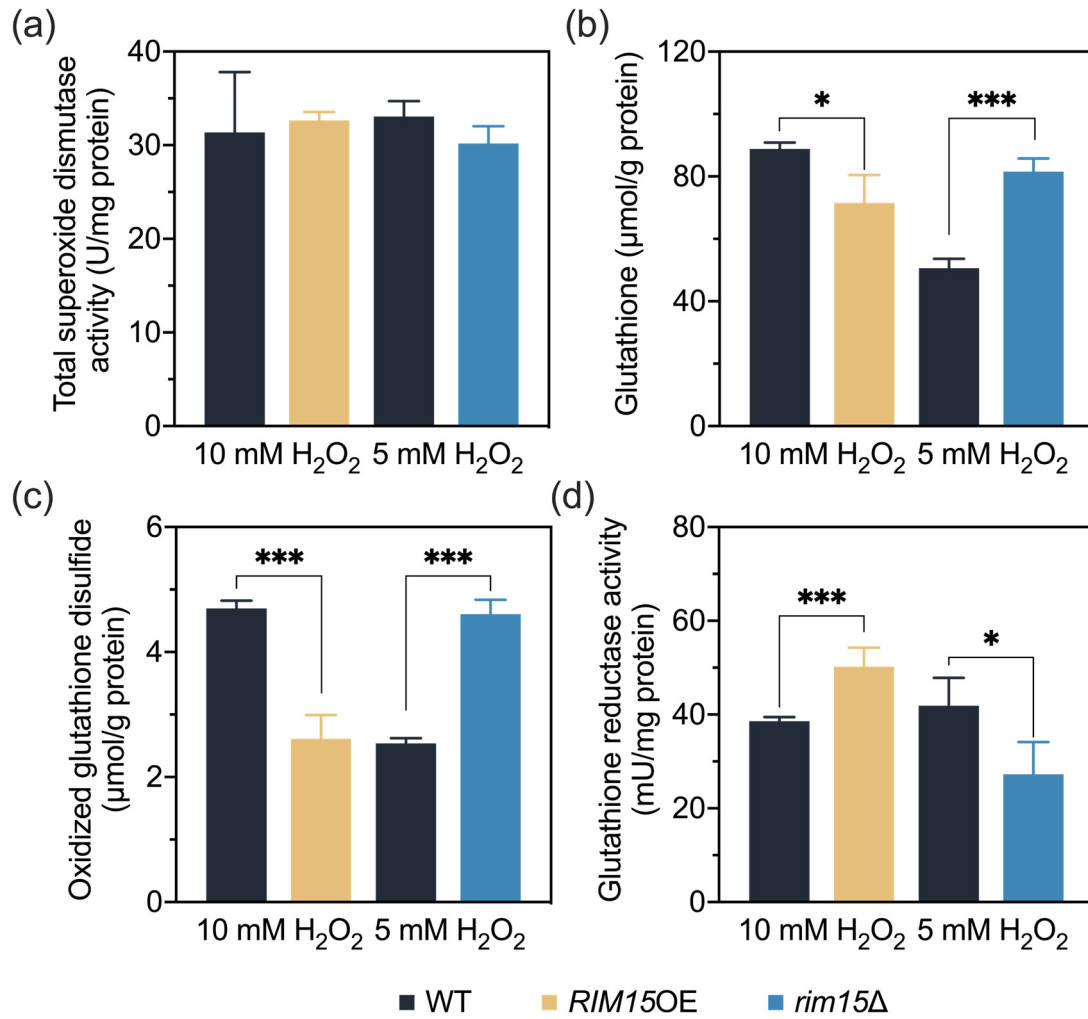

**Figure S8.** Effects of *RIM15* overexpression and deletion on antioxidant status of the yeast strains under oxidative stress. SOD activity (a), GSH (b) and GSSG (c) contents, and GR activity (d) of *S. cerevisiae* *RIM15OE*, *rim15Δ*, and BY4741 strains were measured with or without the treatment with  $H_2O_2$ . The biological triplicates were employed. Error bars represented the standard deviations. Statistical analysis was performed by *t* test, and the significant levels were indicated as follows: \* $P < 0.05$ , \*\*\* $P < 0.001$ .

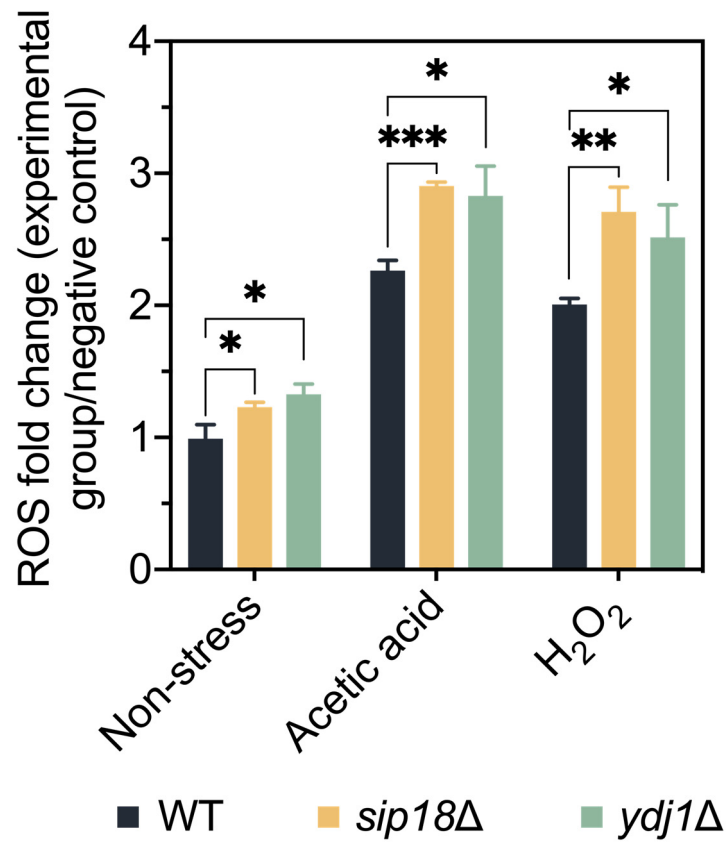

**Figure S9.** Effect of *SIP18* and *YDJ1* gene deletion on ROS accumulation. ROS accumulation of *S. cerevisiae* BY4741, *sip18Δ*, and *ydj1Δ* was measured under non-stress, 4.2 g/L acetic acid stress, and 5 mM H<sub>2</sub>O<sub>2</sub> stress conditions, respectively. The biological triplicates were employed in experiments. Error bars represented the standard deviations. Statistical analysis was performed by *t* test, and the significant levels were indicated as follows: \**P* < 0.05, \*\**P* < 0.01, \*\*\**P* < 0.001.



## Reference

38. Zhang, G.C.; Kong, I.I.; Kim, H.; Liu, J.J.; Cate, J.H.; Jin, Y.S. Construction of a quadruple auxotrophic mutant of an industrial polyploid *saccharomyces cerevisiae* strain by using RNA-guided Cas9 nuclease. *Appl. Environ. Microbiol.* **2014**, *80*, 7694–7701. <https://doi.org/10.1128/aem.02310-14>.
